# Supplementary material for: Photocatalytic degradation of ofloxacin in water assisted by TiO2 nanowires on carbon cloth: contributions of H2O2 addition and substrate absorbability
Source: publisher site journal article supplement (doi:10.3762/bjnano.16.111), 2025-09-08
Supplement: Additional file 1 [file 2190-4286-16-111-S1.pdf]

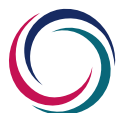

## Supporting Information

for

### **Photocatalytic degradation of ofloxacin in water assisted by TiO<sub>2</sub> nanowires on carbon cloth: contributions of H<sub>2</sub>O<sub>2</sub> addition and substrate absorbability**

Iram Hussain, Lisha Zhang, Zhizhen Ye and Jin-Ming Wu

*Beilstein J. Nanotechnol.* **2025**, *16*, 1567–1579. [doi:10.3762/bjnano.16.111](https://doi.org/10.3762/bjnano.16.111)

## Additional figures

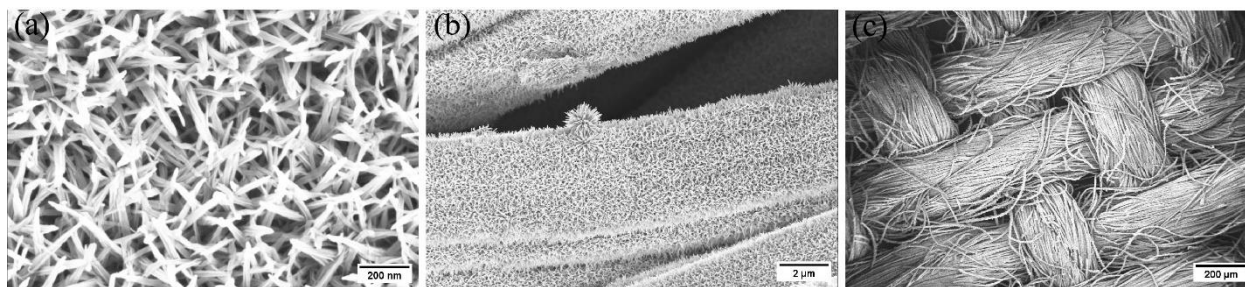

**Figure S1:** SEM images of hydrogen titanate nanowires grown on carbon cloth at different magnifications: (a) High-magnification image showing the dense network of hydrogen titanate nanowires, (b) intermediate magnification highlighting the uniform coating of nanowires on the individual carbon fibers, and (c) low-magnification image displaying the woven structure of the carbon cloth substrate.

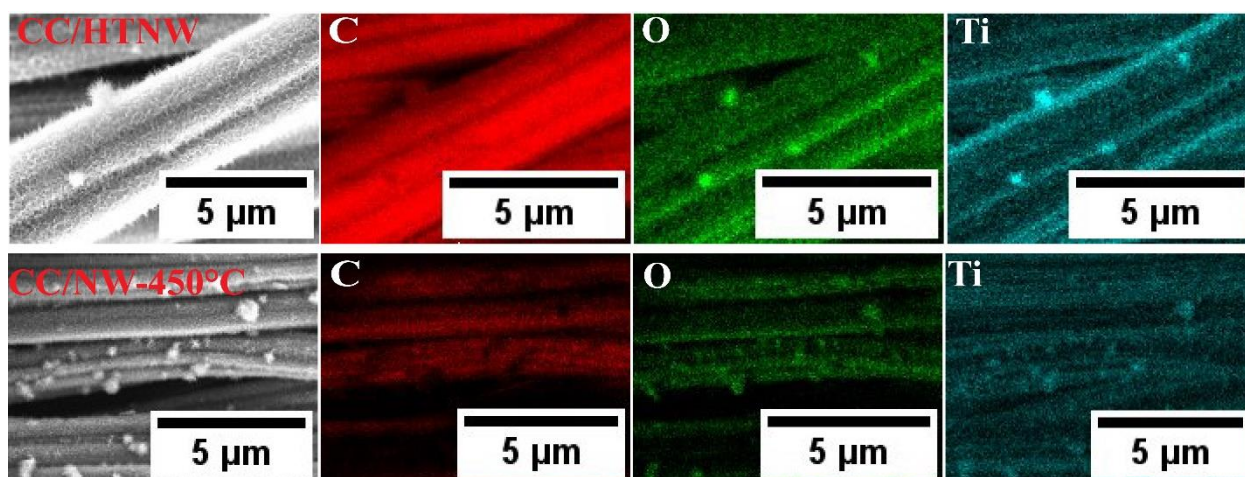

**Figure S2:** EDX elemental mapping images showing the distribution of Ti and O on the carbon cloth substrate coated with hydrogen titanate nanowires (CC/HTNW) and TiO<sub>2</sub> nanowires (CC/NW-450 °C).

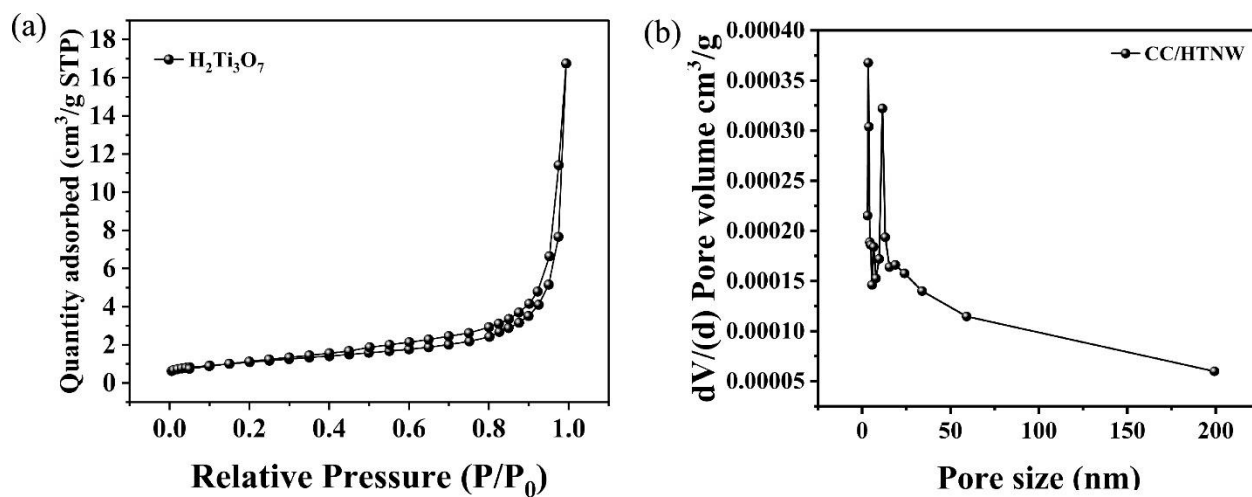

**Figure S3:** (a) Nitrogen adsorption-desorption isotherm for the carbon cloth substrate coated with hydrogen titanate nanowires (CC/HTNW), showing the quantity adsorbed (cm<sup>3</sup>/g STP) as a function of relative pressure ( $P/P_0$ ). (b) Pore size distribution derived from the adsorption data, plotted as the derivative of pore volume ( $dV/d\log(D)$ ) versus pore diameter.

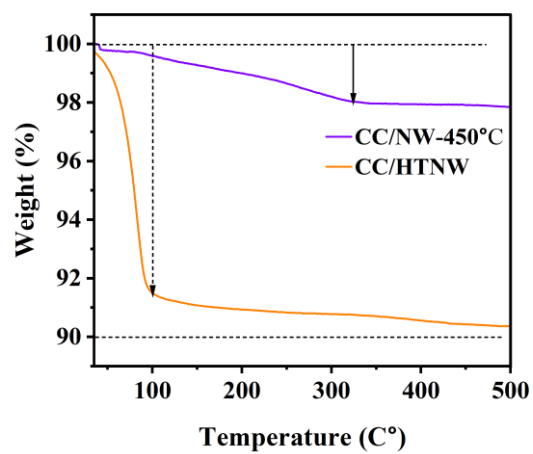

**Figure S4:** Thermogravimetric analysis (TGA) of hydrogen titanate (CC/HTNW) and the TiO<sub>2</sub> nanowires calcined at 450 °C (CC/NW-450 °C), precipitated on carbon cloth.

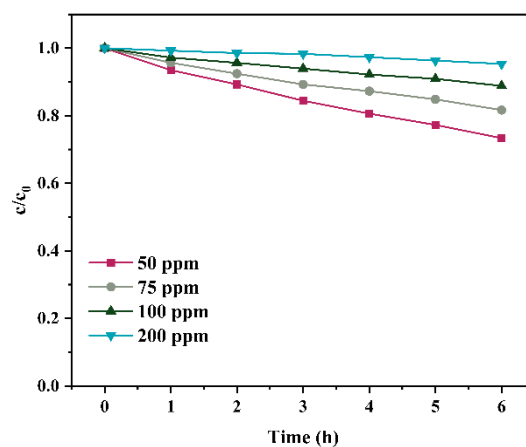

**Figure S5:** Dark adsorption of ofloxacin at different initial concentrations (50, 75, 100, and 200 ppm) in the presence of CC/NW-450 °C composite over 6 h. The plot shows the change in normalized concentration ( $c/c_0$ ) with time, illustrating the adsorption capacity of the TiO<sub>2</sub> nanowire-coated carbon cloth before illumination.

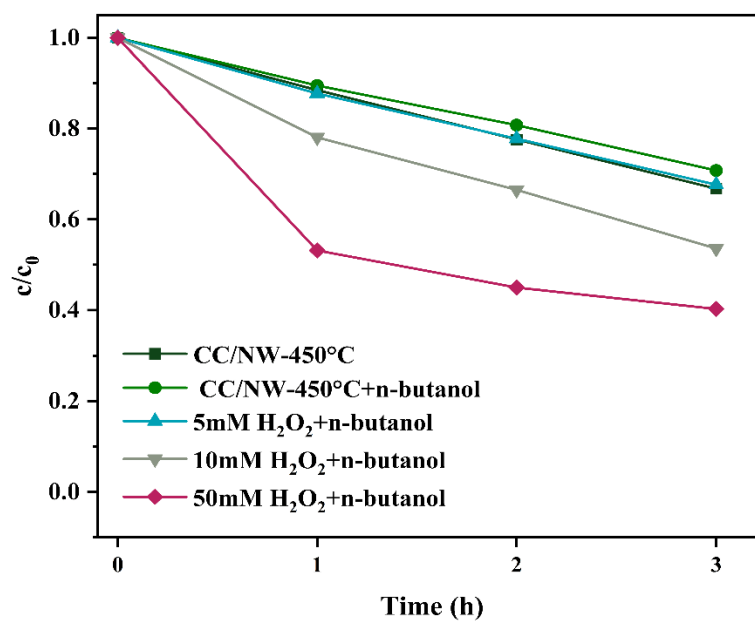

**Figure S6:** Normalized concentration ( $c/c_0$ ) of ofloxacin over time in the presence of the CC/NW-450 °C and varying H<sub>2</sub>O<sub>2</sub> concentrations, monitored with *n*-butanol as a probe for reactive oxygen species. Initial OFL concentration: 100 ppm.

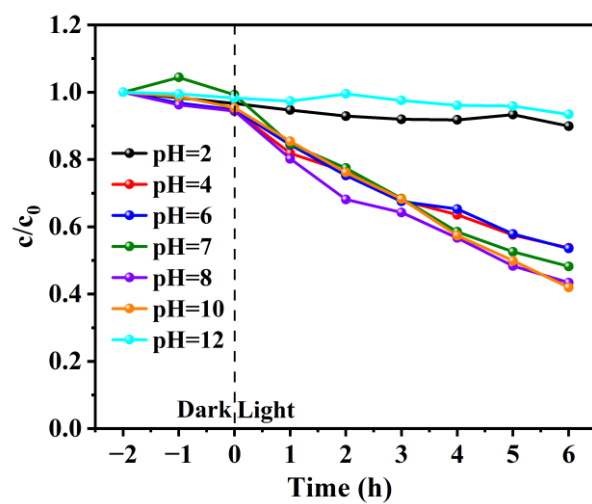

**Figure S7:** Photocatalytic degradation of ofloxacin (100 ppm) using CC/NW-450 °C under varying pH conditions (pH 2–12). The catalyst works in a wide pH range of 4–10.



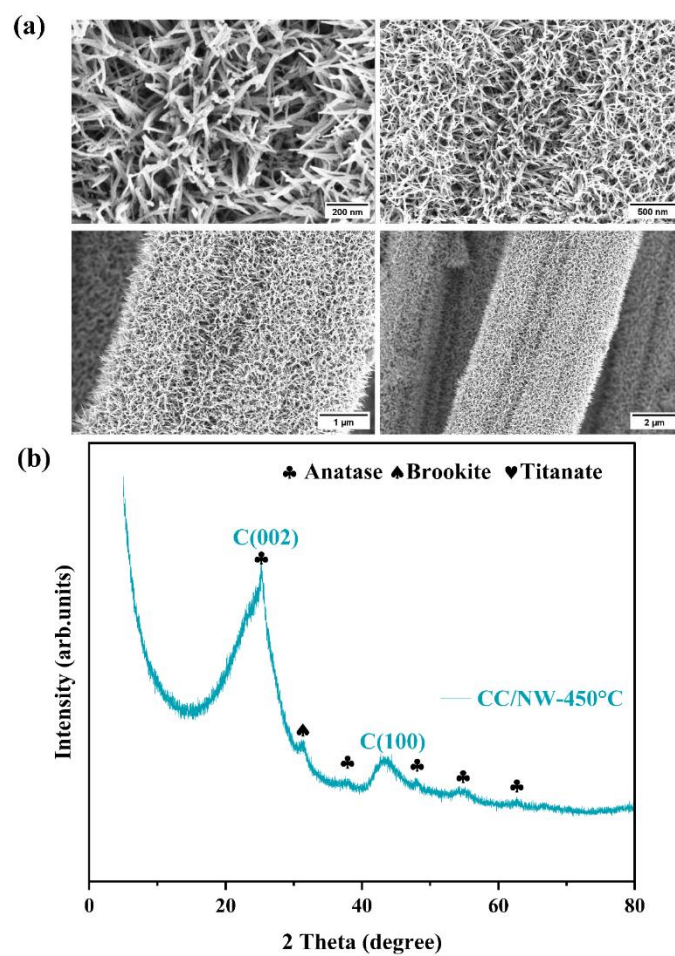

**Figure S8:** (a) FESEM and (b) XRD pattern of CC/NW-450 °C after 6<sup>th</sup> repeated use, suggesting the morphological and structural stability.

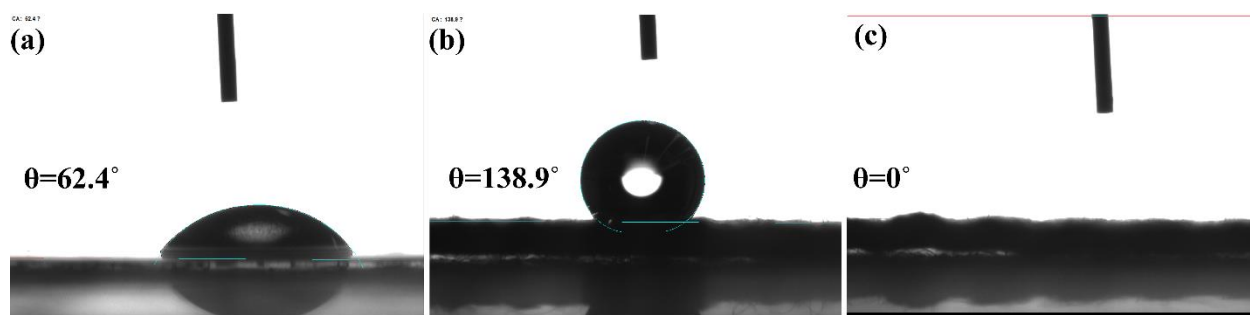

**Figure S9:** Contact angle images showing surface wettability of different samples: (a) Tip/NW-450 °C ( $\theta = 62.4^\circ$ ), (b) pristine carbon cloth (CC) ( $\theta = 138.9^\circ$ ), and (c) CC/NW-450 °C ( $\theta = 0^\circ$ ).
